# Supplementary material for: Low-temperature heat capacity and pseudorotation in 2-methyltetrahydrofuran
Source: Royal Society of Chemistry journal article supplement (doi:10.1039/d1cp05073g), 2022-01-01
Supplement: d1cp05073g1.pdf [file d1cp05073g1.pdf]

## Electronic supplementary information

### Low-temperature heat capacity and pseudorotation in 2-methyltetrahydrofuran

Dmitriy Yu. Ilin,<sup>a</sup> Sergey V. Tarazanov,<sup>b</sup> Valeriy V. Andreychev,<sup>a</sup> Vera A. Lukyanova<sup>a</sup>, Anna I. Druzhinina<sup>a</sup>, Svetlana M. Pimenova<sup>a</sup> and Olga V. Dorofeeva

<sup>a</sup>Department of Chemistry, Lomonosov Moscow State University, 1-3 Leninskie Gory,  
Moscow, 119991, Russia. E-mail: dorofeeva@phys.chem.msu.ru

<sup>b</sup>All-Russia Research Institute of Oil Refining, 6/2 Aviamotornaya st., Moscow, 111116, Russia

## Contents

|                                                                                                                                                                                                                | page |
|----------------------------------------------------------------------------------------------------------------------------------------------------------------------------------------------------------------|------|
| <b>Table S1</b> Raw experimental molar heat capacity of 2-MTHF in the crystal and liquid states                                                                                                                | 2    |
| <b>Table S2</b> Raw experimental molar heat capacity of 2-MTHF in the vitrified state                                                                                                                          | 5    |
| <b>Table S3</b> Fractional melting of 2-MTHF                                                                                                                                                                   | 6    |
| <b>Table S4</b> Molar enthalpy, $\Delta_{\text{cr}}^{\text{liq}} H_{\text{m}}^{\circ}(T_{\text{m}})$ , and entropy, $\Delta_{\text{cr}}^{\text{liq}} S_{\text{m}}^{\circ}(T_{\text{m}})$ , of fusion of 2-MTHF | 8    |
| <b>Table S5</b> Coefficients of eqn (3) which approximate the experimental heat capacity of 2-MTHF                                                                                                             | 10   |
| <b>Table S6</b> Atomic coordinates of the stable conformers and transition states of 2-MTHF calculated at different levels of theory                                                                           | 12   |
| <b>Table S7</b> The relative energies of stable conformers and the barrier heights for transition states of 2-MTHF determined by different computational methods                                               | 16   |
| <b>Table S8</b> Ideal gas thermodynamic properties of 2-MTHF                                                                                                                                                   | 17   |
| <b>Table S9</b> Contributions to the thermodynamic functions of the different types of motion at 298.15 K for 2-MTHF                                                                                           | 18   |
| <b>Fig. S1</b> The dependence of the equilibrium temperature of fusion, $T_i$ , on the reciprocal fraction of the sample melted, $1/F_i$ , for three experiments                                               | 7    |
| <b>Fig. S2</b> Entropy of 2-MTHF in the G-transition region                                                                                                                                                    | 9    |
| <b>Fig. S3</b> Optimized structures of five stable conformers of 2-MTHF from different perspectives which are similar to a more or less distorted envelope (a) or twist (b) configuration                      | 11   |

**Table S1** Raw experimental molar heat capacity of 2-MTHF in the crystal and liquid states  
(Molar mass = 86.132 g·mol<sup>-1</sup>,  $p^0 = 101.3$  kPa)

| $T / K$ | $C_{p,m} / (J \cdot K^{-1} \cdot mol^{-1})$ | $T / K$ | $C_{p,m} / (J \cdot K^{-1} \cdot mol^{-1})$ | $T / K$            | $C_{p,m} / (J \cdot K^{-1} \cdot mol^{-1})$ | $T / K$            | $C_{p,m} / (J \cdot K^{-1} \cdot mol^{-1})$ |
|---------|---------------------------------------------|---------|---------------------------------------------|--------------------|---------------------------------------------|--------------------|---------------------------------------------|
| Crystal |                                             | 42.62   | 35.569                                      | 63.25              | 50.292                                      | 84.34 <sup>b</sup> | 61.820 <sup>b</sup>                         |
| 7.52    | 0.83264                                     | 43.46   | 36.286                                      | 63.30              | 50.333                                      | 84.89 <sup>b</sup> | 62.219 <sup>b</sup>                         |
| 7.67    | 0.88411                                     | 44.27   | 36.987                                      | 63.65              | 50.462                                      | 85.44 <sup>b</sup> | 62.451 <sup>b</sup>                         |
| 9.92    | 1.8872                                      | 45.06   | 37.656                                      | 63.80              | 50.565                                      | 85.98 <sup>b</sup> | 62.775 <sup>b</sup>                         |
| 10.62   | 2.3824                                      | 45.83   | 38.224                                      | 64.05              | 50.705                                      | 86.52 <sup>b</sup> | 63.082 <sup>b</sup>                         |
| 11.51   | 3.0011                                      | 46.59   | 38.787                                      | 64.29              | 50.876                                      | 87.06 <sup>b</sup> | 63.261 <sup>b</sup>                         |
| 12.43   | 3.7666                                      | 47.32   | 39.349                                      | 64.78              | 51.071                                      | 87.60 <sup>b</sup> | 63.589 <sup>b</sup>                         |
| 12.75   | 4.0348                                      | 48.04   | 39.915                                      | 65.27              | 51.298                                      | 88.13 <sup>b</sup> | 63.909 <sup>b</sup>                         |
| 13.72   | 4.9383                                      | 48.75   | 40.425                                      | 65.75              | 51.536                                      | 88.66              | 64.210                                      |
| 14.77   | 5.9598                                      | 49.45   | 40.917                                      | 66.23              | 51.772                                      | 89.19              | 64.526                                      |
| 15.66   | 6.8720                                      | 50.13   | 41.400                                      | 66.70              | 52.096                                      | 89.71              | 64.705                                      |
| 16.44   | 7.7170                                      | 50.80   | 41.887                                      | 67.17              | 52.427                                      | 79.25 <sup>a</sup> | 58.997 <sup>a</sup>                         |
| 17.15   | 8.5047                                      | 51.45   | 42.403                                      | 67.64              | 52.646                                      | 80.06              | 59.464                                      |
| 17.79   | 9.2327                                      | 52.10   | 42.880                                      | 68.10              | 52.825                                      | 80.87              | 59.969                                      |
| 18.39   | 9.9026                                      | 52.73   | 43.433                                      | 68.56              | 53.085                                      | 81.68              | 60.361                                      |
| 18.95   | 10.563                                      | 53.36   | 43.968                                      | 69.02              | 53.393                                      | 82.49 <sup>b</sup> | 60.821 <sup>b</sup>                         |
| 19.47   | 11.191                                      | 53.52   | 44.068                                      | 69.47              | 53.625                                      | 83.30 <sup>b</sup> | 61.294 <sup>b</sup>                         |
| 19.97   | 11.775                                      | 54.00   | 44.416                                      | 69.92              | 53.825                                      | 84.11 <sup>b</sup> | 61.701 <sup>b</sup>                         |
| 20.17   | 12.024                                      | 54.49   | 44.840                                      | 70.47              | 54.117                                      | 84.92 <sup>b</sup> | 62.154 <sup>b</sup>                         |
| 21.48   | 13.552                                      | 54.97   | 45.227                                      | 71.13              | 54.419                                      | 85.73 <sup>b</sup> | 62.555 <sup>b</sup>                         |
| 21.60   | 13.680                                      | 55.44   | 45.486                                      | 71.79              | 54.838                                      | 86.54 <sup>b</sup> | 63.043 <sup>b</sup>                         |
| 23.52   | 15.926                                      | 55.91   | 45.912                                      | 72.44              | 55.230                                      | 87.35 <sup>b</sup> | 63.488 <sup>b</sup>                         |
| 24.07   | 16.564                                      | 56.37   | 46.240                                      | 73.08              | 55.508                                      | 88.16 <sup>b</sup> | 63.883 <sup>b</sup>                         |
| 25.26   | 18.007                                      | 56.83   | 46.575                                      | 73.72              | 55.928                                      | 88.97              | 64.321                                      |
| 26.12   | 18.989                                      | 57.28   | 46.872                                      | 74.35              | 56.249                                      | 89.78              | 64.732                                      |
| 27.91   | 20.981                                      | 57.73   | 47.199                                      | 74.97              | 56.628                                      | 90.59              | 65.158                                      |
| 29.51   | 22.809                                      | 58.18   | 47.378                                      | 75.59              | 56.959                                      | 91.40              | 65.592                                      |
| 30.98   | 24.437                                      | 58.62   | 47.635                                      | 76.21              | 57.348                                      | 92.21              | 66.094                                      |
| 32.33   | 25.905                                      | 59.06   | 47.948                                      | 76.82              | 57.697                                      | 93.03              | 66.522                                      |
| 33.60   | 27.225                                      | 59.49   | 48.101                                      | 77.42              | 58.044                                      | 93.84              | 66.874                                      |
| 34.79   | 28.475                                      | 59.92   | 48.307                                      | 78.02              | 58.464                                      | 94.65              | 67.308                                      |
| 35.91   | 29.511                                      | 60.35   | 48.493                                      | 78.62              | 58.782                                      | 95.46              | 67.780                                      |
| 36.99   | 30.528                                      | 60.78   | 48.859                                      | 79.21              | 59.047                                      | 96.27              | 68.204                                      |
| 38.02   | 31.473                                      | 61.20   | 49.105                                      | 79.79              | 59.395                                      | 97.08              | 68.652                                      |
| 39.00   | 32.354                                      | 61.71   | 49.405                                      | 80.37              | 59.711                                      | 97.90              | 69.054                                      |
| 39.96   | 33.240                                      | 62.03   | 49.581                                      | 80.95              | 60.005                                      | 98.71              | 69.507                                      |
| 40.87   | 34.040                                      | 62.29   | 49.725                                      | 81.52              | 60.392                                      | 99.52              | 69.911                                      |
| 41.76   | 34.837                                      | 62.80   | 50.125                                      | 82.66 <sup>b</sup> | 61.043 <sup>b</sup>                         | 100.33             | 70.333                                      |

**Table S1** (continued)

| $T / \text{K}$      | $C_{p,m} / (\text{J}\cdot\text{K}^{-1}\cdot\text{mol}^{-1})$ | $T / \text{K}$      | $C_{p,m} / (\text{J}\cdot\text{K}^{-1}\cdot\text{mol}^{-1})$ | $T / \text{K}$ | $C_{p,m} / (\text{J}\cdot\text{K}^{-1}\cdot\text{mol}^{-1})$ | $T / \text{K}$      | $C_{p,m} / (\text{J}\cdot\text{K}^{-1}\cdot\text{mol}^{-1})$ |
|---------------------|--------------------------------------------------------------|---------------------|--------------------------------------------------------------|----------------|--------------------------------------------------------------|---------------------|--------------------------------------------------------------|
| 101.15              | 70.754                                                       | 131.86 <sup>c</sup> | 89.322 <sup>c</sup>                                          | 172.17         | 131.78                                                       | 202.09              | 134.04                                                       |
| 101.95              | 71.182                                                       | 132.66 <sup>c</sup> | 91.398 <sup>c</sup>                                          | 172.98         | 131.74                                                       | 203.31              | 134.11                                                       |
| 102.76              | 71.655                                                       | 133.46 <sup>c</sup> | 93.599 <sup>c</sup>                                          | 173.79         | 131.77                                                       | 204.54              | 134.22                                                       |
| 103.57              | 72.048                                                       | 134.27              | 95.102                                                       | 174.61         | 131.83                                                       | 205.76              | 134.43                                                       |
| 104.38              | 72.511                                                       | 136.10              | 122.64                                                       | 175.42         | 131.82                                                       | 206.99              | 134.67                                                       |
| 105.19              | 72.951                                                       | 136.62              | 200.19                                                       | 176.24         | 131.94                                                       | 208.21              | 134.70                                                       |
| 105.99              | 73.444                                                       | Liquid              |                                                              | 177.05         | 132.02                                                       | 209.44              | 134.91                                                       |
| 106.80              | 73.907                                                       | 148.50              | 132.34                                                       | 177.87         | 132.00                                                       | 211.89              | 135.23                                                       |
| 107.61              | 74.351                                                       | 149.32              | 132.30                                                       | 178.69         | 131.84                                                       | 213.12              | 135.31                                                       |
| 108.42              | 74.808                                                       | 150.13              | 132.22                                                       | 179.50         | 132.01                                                       | 214.35              | 135.57                                                       |
| 109.23              | 75.273                                                       | 150.95              | 132.24                                                       | 180.31         | 132.07                                                       | 215.58              | 135.80                                                       |
| 110.04              | 75.732                                                       | 151.76              | 132.17                                                       | 181.13         | 132.11                                                       | 216.81              | 135.97                                                       |
| 110.85              | 76.229                                                       | 152.58              | 132.02                                                       | 181.94         | 132.15                                                       | 218.03              | 136.10                                                       |
| 111.66              | 76.689                                                       | 153.40              | 131.98                                                       | 182.76         | 132.22                                                       | 219.26              | 136.32                                                       |
| 112.47              | 77.249                                                       | 154.21              | 131.92                                                       | 183.57         | 132.23                                                       | 220.49              | 136.50                                                       |
| 113.28              | 77.735                                                       | 155.03              | 131.82                                                       | 184.39         | 132.28                                                       | 221.72              | 136.73                                                       |
| 114.09              | 78.265                                                       | 155.85              | 131.80                                                       | 185.20         | 132.31                                                       | 222.95              | 137.00                                                       |
| 114.90              | 78.764                                                       | 156.66              | 131.65                                                       | 186.02         | 132.40                                                       | 224.18 <sup>c</sup> | 138.72 <sup>c</sup>                                          |
| 115.71              | 79.268                                                       | 157.48              | 131.58                                                       | 186.83         | 132.43                                                       | 225.41              | 137.41                                                       |
| 116.52              | 79.825                                                       | 158.30              | 131.66                                                       | 187.64         | 132.44                                                       | 226.64              | 137.68                                                       |
| 117.32              | 80.300                                                       | 159.11              | 131.65                                                       | 188.46         | 132.57                                                       | 227.87              | 137.96                                                       |
| 118.13              | 80.878                                                       | 159.93              | 131.66                                                       | 189.27         | 132.67                                                       | 229.10              | 138.17                                                       |
| 118.94              | 81.391                                                       | 160.74              | 131.66                                                       | 190.08         | 132.73                                                       | 230.33              | 138.37                                                       |
| 119.75              | 81.873                                                       | 161.56              | 131.59                                                       | 190.90         | 132.86                                                       | 231.56              | 138.98                                                       |
| 120.56              | 82.423                                                       | 162.38              | 131.65                                                       | 191.71         | 132.86                                                       | 232.79              | 138.82                                                       |
| 121.37              | 82.910                                                       | 163.19              | 131.54                                                       | 192.52         | 132.90                                                       | 234.03              | 139.04                                                       |
| 122.18              | 83.450                                                       | 164.01              | 131.61                                                       | 193.34         | 133.04                                                       | 235.26              | 139.38                                                       |
| 122.99              | 83.950                                                       | 164.82              | 131.62                                                       | 194.15         | 133.11                                                       | 236.49              | 139.60                                                       |
| 123.80              | 84.422                                                       | 165.64              | 131.58                                                       | 194.97         | 133.17                                                       | 237.73              | 139.86                                                       |
| 124.61              | 84.867                                                       | 166.46              | 131.64                                                       | 195.78         | 133.28                                                       | 238.96              | 140.10                                                       |
| 125.42              | 85.176                                                       | 167.27              | 131.67                                                       | 196.59         | 133.39                                                       | 240.20              | 140.31                                                       |
| 126.23 <sup>c</sup> | 85.466 <sup>c</sup>                                          | 168.09              | 131.61                                                       | 197.41         | 133.43                                                       | 241.43              | 140.55                                                       |
| 127.04 <sup>c</sup> | 85.691 <sup>c</sup>                                          | 168.90              | 131.72                                                       | 198.22         | 133.49                                                       | 242.67              | 140.84                                                       |
| 127.85 <sup>c</sup> | 85.881 <sup>c</sup>                                          | 169.72              | 131.64                                                       | 199.03         | 133.58                                                       | 243.90 <sup>c</sup> | 143.01 <sup>c</sup>                                          |
| 130.26 <sup>c</sup> | 86.520 <sup>c</sup>                                          | 170.53              | 131.66                                                       | 199.84         | 133.72                                                       | 245.13              | 141.34                                                       |
| 131.07 <sup>c</sup> | 87.648 <sup>c</sup>                                          | 171.35              | 131.73                                                       | 200.86         | 133.85                                                       | 246.37              | 141.62                                                       |

**Table S1** (continued)

| $T / \text{K}$      | $C_{p,m} / (\text{J}\cdot\text{K}^{-1}\cdot\text{mol}^{-1})$ | $T / \text{K}$      | $C_{p,m} / (\text{J}\cdot\text{K}^{-1}\cdot\text{mol}^{-1})$ | $T / \text{K}$      | $C_{p,m} / (\text{J}\cdot\text{K}^{-1}\cdot\text{mol}^{-1})$ |
|---------------------|--------------------------------------------------------------|---------------------|--------------------------------------------------------------|---------------------|--------------------------------------------------------------|
| 247.61              | 141.96                                                       | 279.91              | 150.21                                                       | 317.65              | 160.37                                                       |
| 248.84              | 142.22                                                       | 281.16              | 150.58                                                       | 319.26              | 160.83                                                       |
| 250.08              | 142.52                                                       | 282.41              | 150.93                                                       | 320.85              | 161.35                                                       |
| 251.32              | 142.78                                                       | 283.65              | 151.22                                                       | 322.45              | 161.81                                                       |
| 252.55              | 143.07                                                       | 284.91              | 151.58                                                       | 324.04              | 162.27                                                       |
| 253.79              | 143.40                                                       | 286.16              | 151.91                                                       | 325.62              | 162.71                                                       |
| 255.03              | 143.70                                                       | 287.41              | 152.26                                                       | 327.17              | 163.49                                                       |
| 256.27              | 144.00                                                       | 288.64              | 152.66                                                       | 328.75              | 163.89                                                       |
| 257.51              | 144.30                                                       | 289.89              | 153.03                                                       | 330.32              | 164.41                                                       |
| 258.76              | 144.58                                                       | 291.14 <sup>c</sup> | 155.73 <sup>c</sup>                                          | 332.00              | 164.77                                                       |
| 259.99 <sup>c</sup> | 147.09 <sup>c</sup>                                          | 292.39              | 153.77                                                       | 333.41 <sup>c</sup> | 164.12 <sup>c</sup>                                          |
| 261.23              | 145.32                                                       | 293.65              | 154.19                                                       | 334.95              | 165.41                                                       |
| 262.48              | 145.52                                                       | 294.90              | 154.51                                                       | 336.41              | 166.01                                                       |
| 263.72              | 145.82                                                       | 296.15              | 154.89                                                       | 337.93              | 166.65                                                       |
| 264.96              | 146.12                                                       | 297.41              | 155.34                                                       | 339.45              | 167.08                                                       |
| 266.20              | 146.45                                                       | 298.66              | 155.67                                                       | 340.96              | 167.29                                                       |
| 267.44              | 146.81                                                       | 299.92              | 156.00                                                       | 342.46              | 168.70                                                       |
| 268.69              | 147.12                                                       | 301.40              | 155.73                                                       | 343.95              | 168.46                                                       |
| 269.93              | 147.44                                                       | 303.04              | 156.09                                                       | 345.45 <sup>c</sup> | 165.98 <sup>c</sup>                                          |
| 271.18              | 147.73                                                       | 304.68              | 156.57                                                       | 346.86              | 169.12                                                       |
| 272.42              | 148.06                                                       | 306.32              | 157.94                                                       | 348.32              | 170.04                                                       |
| 273.67              | 148.41                                                       | 307.95 <sup>c</sup> | 157.56 <sup>c</sup>                                          | 349.78              | 170.39                                                       |
| 274.91              | 148.70                                                       | 309.58              | 158.00                                                       | 351.12              | 170.98                                                       |
| 276.1 <sup>c</sup>  | 151.44 <sup>c</sup>                                          | 311.20              | 159.24                                                       | 352.57              | 171.44                                                       |
| 277.40              | 149.54                                                       | 312.82              | 159.00                                                       | 354.02              | 171.96                                                       |
| 278.66              | 149.85                                                       | 314.44              | 159.50                                                       |                     |                                                              |

<sup>a</sup> The experimental points up to  $T = 79.25$  K are measured in a helium bath, after this temperature in a nitrogen bath.

<sup>b</sup> The uncertainty in  $C_{p,m}$  values at these temperatures is 0.5% due to the presence of argon in the calorimeter, not 0.2% as it was obtained for testing the calorimeter with reference samples of copper and n-heptane (see text for details).

<sup>c</sup> These points are defined as outliers and they are not shown in Fig. 2.

**Table S2** Raw experimental molar heat capacity of 2-MTHF in the vitrified state  
(Molar mass = 86.1322 g·mol<sup>-1</sup>,  $p^0 = 101.3$  kPa)

| $T / \text{K}$ | $C_{p,m} / (\text{J}\cdot\text{K}^{-1}\cdot\text{mol}^{-1})$ |
|----------------|--------------------------------------------------------------|----------------|--------------------------------------------------------------|----------------|--------------------------------------------------------------|----------------|--------------------------------------------------------------|
| 79.15          | 62.315                                                       | 85.62          | 67.391                                                       | 91.64          | 141.068                                                      | 98.17          | 139.808                                                      |
| 79.95          | 62.875                                                       | 86.43          | 68.260                                                       | 92.43          | 141.591                                                      | 98.99          | 139.609                                                      |
| 80.76          | 63.530                                                       | 87.24          | 69.452                                                       | 93.25          | 141.261                                                      | 99.81          | 139.337                                                      |
| 81.57          | 64.127                                                       | 88.06          | 71.013                                                       | 94.07          | 141.063                                                      | 100.63         | 139.123                                                      |
| 82.38          | 64.805                                                       | 88.87          | 73.494                                                       | 94.89          | 140.729                                                      | 101.45         | 139.427                                                      |
| 83.19          | 65.354                                                       | 89.66          | 78.394                                                       | 95.71          | 140.543                                                      |                |                                                              |
| 84.00          | 65.975                                                       | 90.38          | 94.906                                                       | 96.53          | 140.306                                                      |                |                                                              |
| 84.81          | 66.689                                                       | 90.96          | 128.898                                                      | 97.35          | 140.075                                                      |                |                                                              |

**Table S3** Fractional melting of 2-MTHF<sup>a</sup>(Molar mass = 86.1322 g·mol<sup>-1</sup>,  $m_{\text{vacuum}} = 0.74959_3$  g,  $T_m = 137.20$  K,  $p^\circ = 101.3$  kPa)

| I              |                             |                           |       |                     | II             |                             |                           |       |                     | III            |                             |                           |       |                     |
|----------------|-----------------------------|---------------------------|-------|---------------------|----------------|-----------------------------|---------------------------|-------|---------------------|----------------|-----------------------------|---------------------------|-------|---------------------|
| $T_i/\text{K}$ | $Q_{\text{input}}/\text{J}$ | $Q_{\text{fus}}/\text{J}$ | $F_i$ | $1/F_i$             | $T_i/\text{K}$ | $Q_{\text{input}}/\text{J}$ | $Q_{\text{fus}}/\text{J}$ | $F_i$ | $1/F_i$             | $T_i/\text{K}$ | $Q_{\text{input}}/\text{J}$ | $Q_{\text{fus}}/\text{J}$ | $F_i$ | $1/F_i^a$           |
| 122.55         | 3.075                       |                           |       |                     | 127.761        | 3.075                       |                           |       |                     | 127.623        | 4.820                       |                           |       |                     |
| 124.45         | 6.150                       |                           |       |                     | 129.566        | 6.149                       |                           |       |                     | 130.549        | 9.640                       |                           |       |                     |
| 126.326        | 9.225                       |                           |       |                     | 131.346        | 9.224                       |                           |       |                     | 133.628        | 14.459                      |                           |       |                     |
| 128.18         | 12.299                      |                           |       |                     | 133.094        | 12.298                      |                           |       |                     | 136.902        | 19.280                      | 4.821                     | 0.091 | 11.000 <sup>b</sup> |
| 130.008        | 15.373                      |                           |       |                     | 134.784        | 15.372                      |                           |       |                     | 137.019        | 24.101                      | 9.642                     | 0.182 | 5.500               |
| 131.803        | 18.447                      |                           |       |                     | 136.383        | 18.447                      | 3.075                     | 0.056 | 18.000 <sup>b</sup> | 137.069        | 28.922                      | 14.463                    | 0.273 | 3.667               |
| 133.566        | 21.521                      |                           |       |                     | 136.869        | 21.522                      | 6.150                     | 0.111 | 9.000               | 137.097        | 33.743                      | 19.284                    | 0.364 | 2.750               |
| 135.352        | 24.595                      |                           |       |                     | 136.974        | 24.597                      | 9.225                     | 0.167 | 6.000               | 137.116        | 38.564                      | 24.105                    | 0.455 | 2.200               |
| 136.859        | 27.670                      | 3.075                     | 0.059 | 17.000 <sup>b</sup> | 137.027        | 27.673                      | 12.300                    | 0.222 | 4.500               | 137.131        | 43.385                      | 28.926                    | 0.545 | 1.833               |
| 136.98         | 30.744                      | 6.149                     | 0.118 | 8.500               | 137.061        | 30.748                      | 15.376                    | 0.278 | 3.600               | 137.146        | 48.206                      | 33.747                    | 0.636 | 1.571               |
| 137.033        | 33.819                      | 9.224                     | 0.176 | 5.667               | 137.084        | 33.823                      | 18.451                    | 0.333 | 3.000               | 137.16         | 53.027                      | 38.568                    | 0.727 | 1.375               |
| 137.064        | 36.893                      | 12.298                    | 0.235 | 4.250               | 137.102        | 36.898                      | 21.526                    | 0.389 | 2.571               | 137.174        | 57.848                      | 43.389                    | 0.818 | 1.222               |
| 137.086        | 39.968                      | 15.373                    | 0.294 | 3.400               | 137.115        | 39.973                      | 24.601                    | 0.444 | 2.250               | 137.186        | 62.668                      | 48.210                    | 0.909 | 1.100 <sup>b</sup>  |
| 137.102        | 43.042                      | 18.447                    | 0.353 | 2.833               | 137.131        | 43.048                      | 27.676                    | 0.500 | 2.000               | 137.195        | 67.488                      | 53.029                    | 1.000 | 1.000 <sup>b</sup>  |
| 137.115        | 46.117                      | 21.522                    | 0.412 | 2.429               | 137.139        | 46.123                      | 30.751                    | 0.556 | 1.800               | 138.802        | 72.307                      |                           |       |                     |
| 137.125        | 49.192                      | 24.597                    | 0.471 | 2.125               | 137.148        | 49.198                      | 33.826                    | 0.611 | 1.636               | 141.073        | 77.126                      |                           |       |                     |
| 137.137        | 52.266                      | 27.671                    | 0.529 | 1.889               | 137.157        | 52.273                      | 36.901                    | 0.667 | 1.500               | 143.332        | 81.943                      |                           |       |                     |
| 137.145        | 55.341                      | 30.746                    | 0.588 | 1.700               | 137.165        | 55.348                      | 39.976                    | 0.722 | 1.385               | 145.583        | 86.761                      |                           |       |                     |
| 137.152        | 58.416                      | 33.821                    | 0.647 | 1.545               | 137.174        | 58.423                      | 43.051                    | 0.778 | 1.286               |                |                             |                           |       |                     |
| 137.16         | 61.490                      | 36.895                    | 0.706 | 1.417               | 137.183        | 61.498                      | 46.126                    | 0.833 | 1.200               |                |                             |                           |       |                     |
| 137.168        | 64.565                      | 39.970                    | 0.765 | 1.308               | 137.192        | 64.573                      | 49.201                    | 0.889 | 1.125 <sup>b</sup>  |                |                             |                           |       |                     |
| 137.175        | 67.640                      | 43.045                    | 0.824 | 1.214               | 137.201        | 67.648                      | 52.276                    | 0.944 | 1.059 <sup>b</sup>  |                |                             |                           |       |                     |
| 137.183        | 70.714                      | 46.119                    | 0.882 | 1.133 <sup>b</sup>  | 137.21         | 70.722                      | 55.350                    | 1.000 | 1.000 <sup>b</sup>  |                |                             |                           |       |                     |
| 137.19         | 73.789                      | 49.194                    | 0.941 | 1.062 <sup>b</sup>  | 137.768        | 73.796                      |                           |       |                     |                |                             |                           |       |                     |
| 137.196        | 76.863                      | 52.268                    | 1.000 | 1.000 <sup>b</sup>  | 139.217        | 76.870                      |                           |       |                     |                |                             |                           |       |                     |
| 137.907        | 79.936                      |                           |       |                     | 140.664        | 79.944                      |                           |       |                     |                |                             |                           |       |                     |
| 139.356        | 83.009                      |                           |       |                     | 142.107        | 83.017                      |                           |       |                     |                |                             |                           |       |                     |
| 140.802        | 86.082                      |                           |       |                     |                |                             |                           |       |                     |                |                             |                           |       |                     |
| 142.244        | 89.155                      |                           |       |                     |                |                             |                           |       |                     |                |                             |                           |       |                     |

<sup>a</sup> Notation:  $T_i/\text{K}$  is the equilibrium temperature;  $Q_{\text{input}}/\text{J}$  is the heat introduced;  $Q_{\text{fus}}/\text{J}$  is the melted heat;  $F_i$  is the fraction of the melted sample;  $1/F_i$  is the reciprocal fraction of the melted sample; this data were described by a linear dependence of the equilibrium temperature of fusion,  $T_i$ , on the reciprocal fraction of the sample melted:  $T_i/\text{K} = [(T_1/\text{K}) - (T_m)/\text{K}] \cdot (1/F_i) + (T_m)/\text{K}$ , here,  $T_m = 137.202 \text{ K}$  is the melting temperature of the pure sample,  $[T_1 - T_m] = -0.034 \text{ K}$  is a depression of the  $T_m$  value;  $T_1$  denotes the melting temperature of the completely melted sample ( $F_i = 1$ ). Linear regression coefficient equals  $r^2 = 0.940$ .

<sup>b</sup> These points are not used in the construction of a linear relationship,  $T_i = f(1/F_i)$  (Fig. 1S), in order to exclude experimental points with unstable equilibrium at the beginning and end of the melting process.

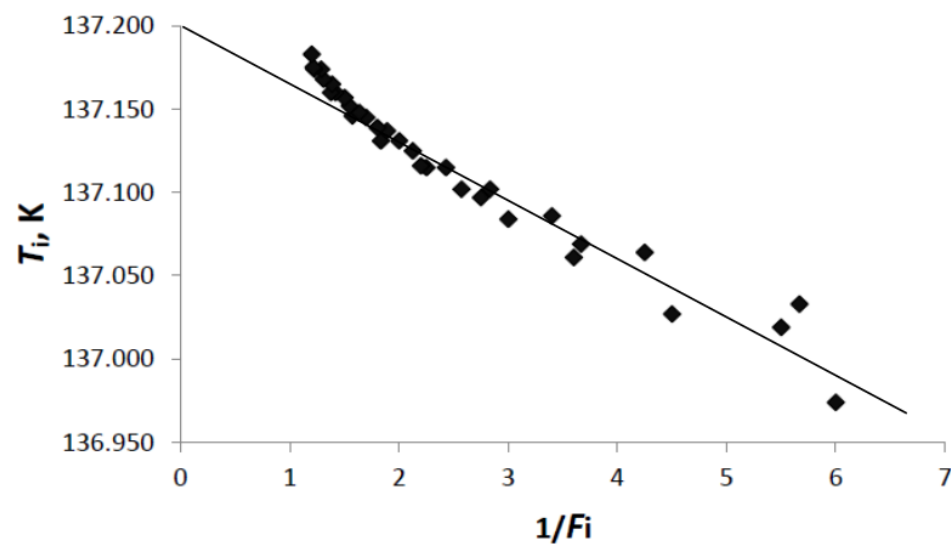

**Fig. S1** The dependence of the equilibrium temperature of fusion,  $T_i$ , on the reciprocal fraction of the sample melted,  $1/F_i$ , for three experiments (Table S3)

**Table S4** Molar enthalpy,  $\Delta_{\text{cr}}^{\text{liq}} H_{\text{m}}^{\circ}(T_{\text{m}})$ , and entropy,  $\Delta_{\text{cr}}^{\text{liq}} S_{\text{m}}^{\circ}(T_{\text{m}})$ , of fusion of 2-MTHF <sup>a</sup>  
(Molar mass = 86.132<sub>2</sub> g·mol<sup>-1</sup>,  $m_{\text{vac}} = 0.74959_3$  g,  $T_{\text{m}} = 137.20$  K) <sup>b</sup>

| $T_{\text{in}}^c$ | $T_{\text{f}}^c$ | $\Delta H_{\text{tot}}^d$ | $\Delta_{T_{\text{in}}}^{T_{\text{m}}} H_{\text{m}}^{\circ}(\text{cr})^e$ | $\Delta_{T_{\text{m}}}^{T_{\text{f}}} H_{\text{m}}^{\circ}(\text{liq})^e$ | $\Delta_{T_{\text{in}}}^{T_{\text{f}}} H_{\text{emp}}^f$ | $\Delta_{\text{cr}}^{\text{liq}} H_{\text{m}}^{\circ}(T_{\text{m}})$ | $\Delta_{\text{cr}}^{\text{liq}} S_{\text{m}}^{\circ}(T_{\text{m}})$ |
|-------------------|------------------|---------------------------|---------------------------------------------------------------------------|---------------------------------------------------------------------------|----------------------------------------------------------|----------------------------------------------------------------------|----------------------------------------------------------------------|
| K                 |                  | J·mol <sup>-1</sup>       |                                                                           |                                                                           |                                                          |                                                                      | J·K <sup>-1</sup> ·mol <sup>-1</sup>                                 |
| 122.628           | 144.849          | 11079.0                   | 1284.3                                                                    | 1014.9                                                                    | 2396.9                                                   | 6383.0                                                               | 46.523                                                               |
| 125.372           | 147.446          | 11077.5                   | 1052.3                                                                    | 1359.0                                                                    | 2409.8                                                   | 6256.4                                                               | 45.601                                                               |
| 124.194           | 146.899          | 11158.2                   | 1152.5                                                                    | 1286.5                                                                    | 2469.1                                                   | 6250.2                                                               | 45.555                                                               |
| 119.911           | 144.81           | 11239.8                   | 1509.4                                                                    | 1009.7                                                                    | 2667.8                                                   | 6052.8                                                               | 44.117                                                               |
| 121.842           | 145.945          | 11238.6                   | 1349.9                                                                    | 1160.1                                                                    | 2601.2                                                   | 6127.4                                                               | 44.660                                                               |
| Mean              |                  |                           |                                                                           |                                                                           |                                                          | 6203 <sup>g</sup>                                                    | 45.21 <sup>g</sup>                                                   |

<sup>a</sup>  $\Delta_{\text{cr}}^{\text{liq}} H_{\text{m}}^{\circ}(T_{\text{m}})$  value was calculated from the equation:  $\Delta_{\text{cr}}^{\text{liq}} H_{\text{m}}^{\circ}(T_{\text{m}})/(\text{J} \cdot \text{mol}^{-1}) = \Delta_{\text{tot}} H - \Delta_{T_{\text{in}}}^{T_{\text{m}}} H_{\text{m}}(\text{cr}) - \Delta_{T_{\text{m}}}^{T_{\text{f}}} H_{\text{m}}(\text{liq}) - \Delta_{T_{\text{in}}}^{T_{\text{f}}} H_{\text{emp}}$

<sup>b</sup> The molar mass of the compound was calculated using relative atomic masses recommended by IUPAC (J. Meija, T. B. Coplen, M. Berglund, W. A. Brand, P. De Bièvre, M. Gröning, N. E. Holden, J. Irrgeher, R. D. Loss, T. Walczyk, T. Prohaska, *Pure Appl. Chem.*, 2016, **88**, 265–291); standard uncertainties  $u$  are  $u(\text{Molar mass}) = 0.002 \text{ g} \cdot \text{mol}^{-1}$ ;  $u(m_{\text{vac}}) = 5 \cdot 10^{-5} \text{ g}$ ; the standard uncertainty of  $u$  is  $u(T_{\text{m}}) = 0.02 \text{ K}$ .

<sup>c</sup>  $T_{\text{in}}$  and  $T_{\text{f}}$  are the initial and final temperatures; the standard uncertainty of  $u$  is  $u(T) = 0.02 \text{ K}$ .

<sup>d</sup>  $\Delta H_{\text{tot}}$  is the energy required to heat one mol of substance from  $T_{\text{in}}$  to  $T_{\text{f}}$ ; the standard uncertainty of  $u$  is  $u(\Delta H_{\text{tot}}) = 22 \text{ J} \cdot \text{mol}^{-1}$ .

<sup>e</sup>  $\Delta_{T_{\text{in}}}^{T_{\text{m}}} H_{\text{m}}(\text{cr}) = \int_{T_{\text{in}}}^{T_{\text{m}}} C_{p,m}(\text{cr}) dT$  and  $\Delta_{T_{\text{m}}}^{T_{\text{f}}} H_{\text{m}}(\text{liq}) = \int_{T_{\text{m}}}^{T_{\text{f}}} C_{p,m}(\text{liq}) dT$  are the heating enthalpies calculated by the extrapolation to  $T_{\text{m}}$  based on the experimental values of the heat capacities of the crystal (120.56 -124.61 K) and liquid (142.31-149.65 K) obtained outside the pre-melting region.

<sup>f</sup>  $\Delta_{T_{\text{in}}}^{T_{\text{f}}} H_{\text{emp}}$  is enthalpy of heating of an empty calorimeter from  $T_{\text{in}}$  to  $T_{\text{f}}$ .

<sup>g</sup> Combined expanded uncertainties  $U_c$  are  $U_c(\Delta_{T_{\text{in}}}^{T_{\text{m}}} H_{\text{m}}^{\circ}(\text{cr})) = 2.5 \text{ J} \cdot \text{mol}^{-1}$ ,  $U_c(\Delta_{T_{\text{m}}}^{T_{\text{f}}} H_{\text{m}}^{\circ}(\text{liq})) = 2.3 \text{ J} \cdot \text{mol}^{-1}$ ,  $U_c(\Delta_{\text{cr}}^{\text{liq}} H_{\text{m}}^{\circ}(T_{\text{m}})) = 240 \text{ J} \cdot \text{mol}^{-1}$  and  $U_c(\Delta_{\text{cr}}^{\text{liq}} S_{\text{m}}^{\circ}(T_{\text{m}})) = 1.7 \text{ J} \cdot \text{K}^{-1} \cdot \text{mol}^{-1}$  (0.95 level of confidence).



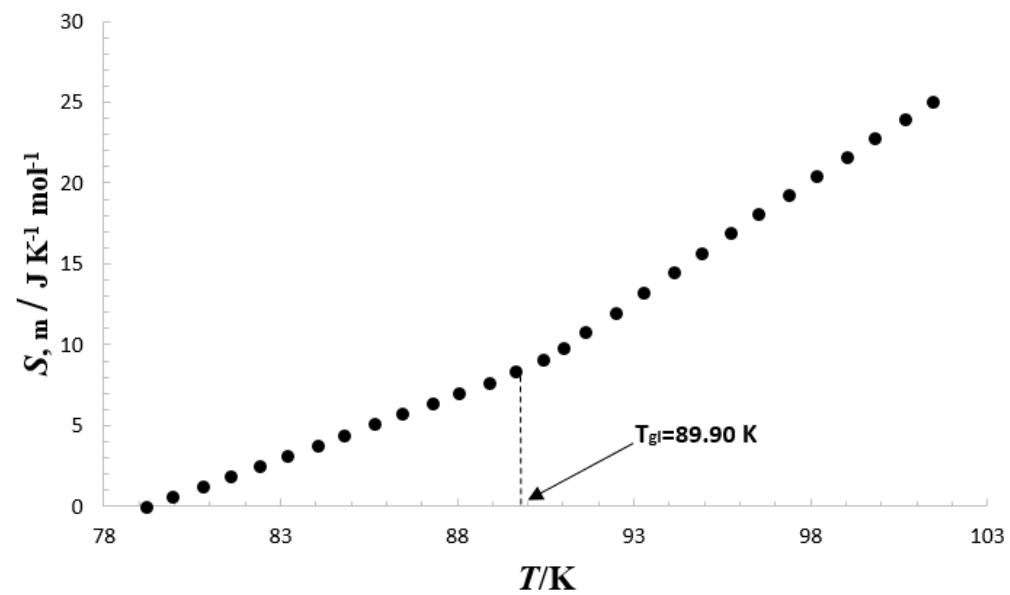

**Fig. S2** Entropy of 2-MTHF in the G-transition region

**Table S5** Coefficients of eqn (3) which approximate the experimental heat capacity of 2-MTHF

| Temperature interval/ K <sup>a</sup> | <i>Crystal</i>        |                       |                       |                     |
|--------------------------------------|-----------------------|-----------------------|-----------------------|---------------------|
|                                      | I                     | II                    | III                   | IV                  |
|                                      | 11.51-48.75           | 45.06-65.27           | 62.29-122.99          | 120.56-125.42       |
| A0                                   | 3.89725333077217E+00  | -1.62757605224256E+03 | 3.43724395363671E+02  | 1.2555542452758E+01 |
| A1                                   | -1.36588820011171E+00 | 1.64700592500753E+02  | -1.78103645849477E+01 | 5.7995605854033E-01 |
| A2                                   | 1.55386207614214E-01  | -6.51942455403247E+00 | 4.03235628570565E-01  |                     |
| A3                                   | -4.40308474541435E-03 | 1.28236965673044E-01  | -4.34226515175575E-03 |                     |
| A4                                   | 5.76529958912840E-05  | -1.24770662801790E-03 | 2.29021588730433E-05  |                     |
| A5                                   | -2.96566172813736E-07 | 4.80319036420137E-06  | -4.72849263583557E-08 |                     |
| RMSD <sup>b</sup>                    | 0.030772029           | 0.071015286           | 0.042114827           | 0.077179892         |
| RMSD,%                               | 0.14                  | 0.16                  | 0.07                  | 0.09                |

**Table S5** (continued)

| Temperature interval/ K <sup>a</sup> | <i>Liquid</i>         |                       |                       |
|--------------------------------------|-----------------------|-----------------------|-----------------------|
|                                      | V                     | VI                    | VII                   |
|                                      | 148.5-159.11          | 150.13-232.79         | 222.95-354.02         |
| A0                                   | 1.43652244180467E+02  | -2.85856282119621E+02 | -7.88414706460763E+02 |
| A1                                   | -7.60596543084794E-02 | 1.28628706218326E+01  | 1.84817447614847E+01  |
| A2                                   |                       | -1.51395617217667E-01 | -1.47157230843916E-01 |
| A3                                   |                       | 8.60734182800276E-04  | 5.76746974287415E-04  |
| A4                                   |                       | -2.38691166056473E-06 | -1.10516346087730E-06 |
| A5                                   |                       | 2.61256124085452E-09  | 8.32681566722261E-10  |
| RMSD <sup>b</sup>                    | 0.057037987           | 0.057778228           | 0.172360925           |
| RMSD,%                               | 0.04                  | 0.04                  | 0.11                  |

<sup>a</sup> Adjacent temperature ranges overlap. The temperatures at which the difference between the heat capacity values calculated by the two neighboring polynomials is minimal in the entire overlap interval were chosen as the crosslinking temperatures of these ranges.

<sup>b</sup> RMSDs are the root-mean-square deviations between the calculated by eqn (3) and experimental  $C_{p,m}$  values.

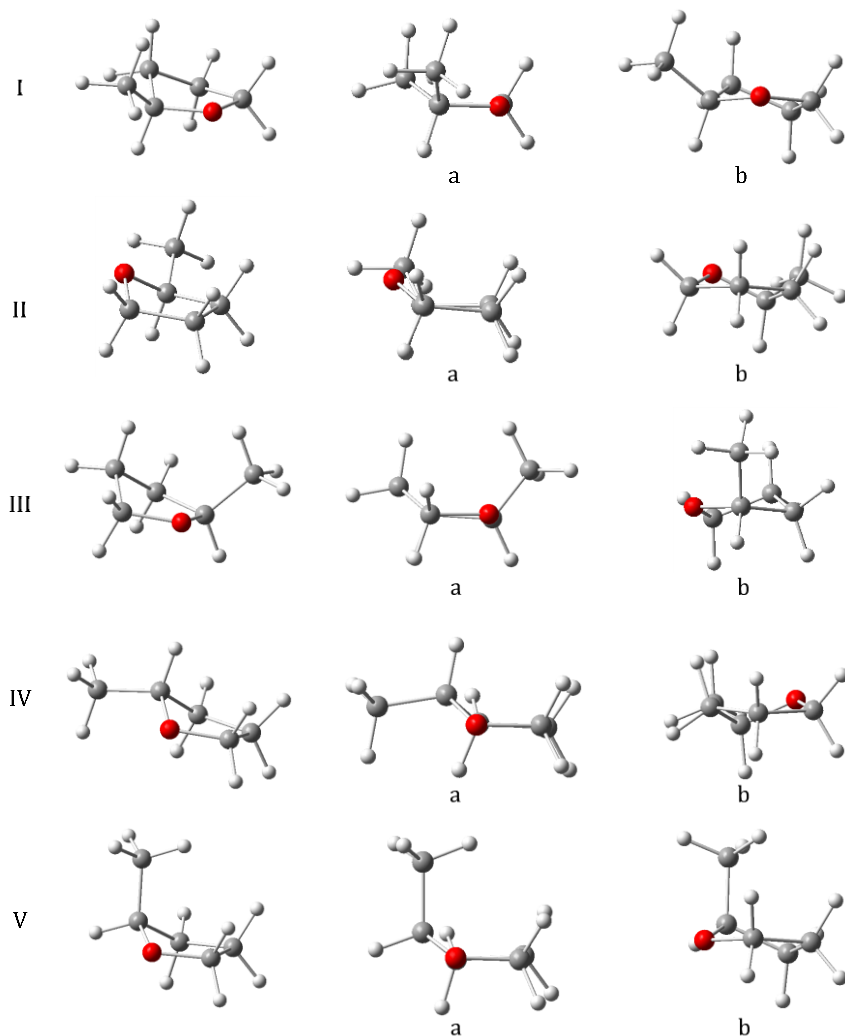

**Fig. S3** Optimized structures of five stable conformers of 2-MTHF from different perspectives which are similar to a more or less distorted envelope (a) or twist (b) configuration

**Table S6** Atomic coordinates of the stable conformers and transition states of 2-MTHF calculated at different levels of theory

| Atom                    | x, Å      | y, Å      | z, Å      | Atom         | x, Å      | y, Å      | z, Å      |
|-------------------------|-----------|-----------|-----------|--------------|-----------|-----------|-----------|
| B3LYP-D3(BJ)/def2-TZVPP |           |           |           |              |           |           |           |
| Conformer I             |           |           |           | Conformer II |           |           |           |
| C1                      | 0.737821  | 0.056801  | -0.397634 | O1           | 0.010910  | -1.110547 | -0.180328 |
| C2                      | -0.118967 | 1.196011  | 0.148501  | C2           | 0.729242  | -0.010380 | 0.378120  |
| C3                      | -1.535211 | 0.665822  | -0.080366 | C3           | -0.102890 | 1.220810  | -0.007546 |
| C4                      | -1.363288 | -0.836560 | 0.171050  | C4           | -1.544593 | 0.675308  | -0.112540 |
| H5                      | 0.790584  | 0.138641  | -1.492444 | C5           | -1.365713 | -0.847620 | 0.053279  |
| H6                      | 0.078063  | 1.324763  | 1.215496  | C6           | 2.149320  | -0.027648 | -0.138810 |
| H7                      | 0.075150  | 2.143995  | -0.351497 | H7           | 0.732287  | -0.115450 | 1.473628  |
| H8                      | -2.278716 | 1.115551  | 0.575857  | H8           | -0.004430 | 2.023278  | 0.722281  |
| H9                      | -1.843435 | 0.848800  | -1.110888 | H9           | 0.236980  | 1.602860  | -0.970654 |
| H10                     | -1.603964 | -1.100787 | 1.204734  | H10          | -2.198714 | 1.082160  | 0.657363  |
| H11                     | -1.983776 | -1.445970 | -0.489291 | H11          | -1.984461 | 0.917614  | -1.078311 |
| O12                     | 0.016157  | -1.137849 | -0.064101 | H12          | -1.637655 | -1.160524 | 1.069249  |
| C13                     | 2.139504  | -0.038013 | 0.165165  | H13          | -1.943713 | -1.438011 | -0.655164 |
| H14                     | 2.651923  | -0.916046 | -0.227133 | H14          | 2.714833  | 0.807390  | 0.276889  |
| H15                     | 2.719424  | 0.846183  | -0.104902 | H15          | 2.651177  | -0.954191 | 0.138632  |
| H16                     | 2.106327  | -0.116707 | 1.252575  | H16          | 2.154216  | 0.056426  | -1.226302 |
| TS1                     |           |           |           |              |           |           |           |
| C1                      | 0.793363  | 0.107389  | -0.528206 |              |           |           |           |
| C2                      | -0.193161 | 1.262348  | -0.273237 |              |           |           |           |
| C3                      | -1.435696 | 0.576902  | 0.342495  |              |           |           |           |
| C4                      | -1.089600 | -0.921737 | 0.304952  |              |           |           |           |
| H5                      | 1.292623  | 0.208399  | -1.492291 |              |           |           |           |
| H6                      | 0.234704  | 2.017677  | 0.384529  |              |           |           |           |
| H7                      | -0.451682 | 1.751375  | -1.210831 |              |           |           |           |
| H8                      | -1.633364 | 0.914148  | 1.358859  |              |           |           |           |
| H9                      | -2.324346 | 0.786122  | -0.250304 |              |           |           |           |
| H10                     | -0.774240 | -1.276804 | 1.292533  |              |           |           |           |
| H11                     | -1.911263 | -1.550206 | -0.034122 |              |           |           |           |
| O12                     | -0.029699 | -1.058485 | -0.634623 |              |           |           |           |
| C13                     | 1.839610  | -0.046909 | 0.569312  |              |           |           |           |
| H14                     | 2.432783  | -0.945799 | 0.403305  |              |           |           |           |
| H15                     | 2.510200  | 0.814013  | 0.579038  |              |           |           |           |
| H16                     | 1.375078  | -0.119002 | 1.554373  |              |           |           |           |
| B3LYP/cc-pVTZ           |           |           |           |              |           |           |           |
| Conformer I             |           |           |           | Conformer II |           |           |           |
| C1                      | 0.735546  | 0.051875  | -0.390087 | O1           | 0.015287  | -1.110298 | -0.176773 |
| C2                      | -0.117334 | 1.198351  | 0.151049  | C2           | 0.729368  | -0.003707 | 0.376493  |
| C3                      | -1.538611 | 0.671473  | -0.071064 | C3           | -0.105884 | 1.221278  | -0.024646 |
| C4                      | -1.372166 | -0.842964 | 0.137638  | C4           | -1.550262 | 0.674829  | -0.094356 |
| H5                      | 0.769709  | 0.116317  | -1.487725 | C5           | -1.366004 | -0.853045 | 0.043909  |
| H6                      | 0.084755  | 1.334458  | 1.216195  | C6           | 2.154793  | -0.027310 | -0.132157 |
| H7                      | 0.075086  | 2.143627  | -0.355617 | H7           | 0.728867  | -0.097294 | 1.473492  |
| H8                      | -2.270644 | 1.106308  | 0.608002  | H8           | 0.003457  | 2.042374  | 0.683149  |
| H9                      | -1.864915 | 0.884601  | -1.090090 | H9           | 0.219386  | 1.579215  | -1.002340 |

|                   |           |           |           |              |           |           |           |
|-------------------|-----------|-----------|-----------|--------------|-----------|-----------|-----------|
| H10               | -1.674103 | -1.151710 | 1.141767  | H10          | -2.178629 | 1.068865  | 0.703580  |
| H11               | -1.951733 | -1.425290 | -0.583287 | H11          | -2.023580 | 0.934261  | -1.039909 |
| O12               | 0.021427  | -1.134655 | -0.017941 | H12          | -1.653623 | -1.188359 | 1.048437  |
| C13               | 2.149506  | -0.036937 | 0.147227  | H13          | -1.932692 | -1.430549 | -0.684555 |
| H14               | 2.650380  | -0.924349 | -0.239382 | H14          | 2.721489  | 0.808599  | 0.280572  |
| H15               | 2.728348  | 0.838822  | -0.151277 | H15          | 2.651838  | -0.953200 | 0.156715  |
| H16               | 2.140050  | -0.096338 | 1.236372  | H16          | 2.169118  | 0.046199  | -1.220415 |
| TS1               |           |           |           |              |           |           |           |
| C1                | 0.796085  | 0.099260  | -0.525593 |              |           |           |           |
| C2                | -0.190371 | 1.259618  | -0.292393 |              |           |           |           |
| C3                | -1.424795 | 0.589716  | 0.358103  |              |           |           |           |
| C4                | -1.108282 | -0.917673 | 0.295548  |              |           |           |           |
| H5                | 1.299324  | 0.188627  | -1.489275 |              |           |           |           |
| H6                | 0.240279  | 2.040040  | 0.333969  |              |           |           |           |
| H7                | -0.461710 | 1.715384  | -1.243556 |              |           |           |           |
| H8                | -1.579075 | 0.919320  | 1.384758  |              |           |           |           |
| H9                | -2.330974 | 0.824894  | -0.197604 |              |           |           |           |
| H10               | -0.824962 | -1.300889 | 1.282505  |              |           |           |           |
| H11               | -1.937357 | -1.520015 | -0.073212 |              |           |           |           |
| O12               | -0.031389 | -1.064684 | -0.625470 |              |           |           |           |
| C13               | 1.844836  | -0.047532 | 0.573757  |              |           |           |           |
| H14               | 2.432883  | -0.951488 | 0.415522  |              |           |           |           |
| H15               | 2.522037  | 0.808653  | 0.571690  |              |           |           |           |
| H16               | 1.385835  | -0.107395 | 1.562436  |              |           |           |           |
| MP2/6-311++G(d,p) |           |           |           |              |           |           |           |
| Conformer II      |           |           |           | Conformer IV |           |           |           |
| O1                | -0.003504 | -1.124612 | -0.155861 | O1           | 0.027108  | -1.108270 | -0.183581 |
| C2                | 0.735567  | -0.035988 | 0.402867  | C2           | 0.714659  | 0.012678  | 0.369738  |
| C3                | -0.114209 | 1.227642  | 0.127245  | C3           | -0.104702 | 1.204854  | -0.120850 |
| C4                | -1.500283 | 0.664857  | -0.263139 | C4           | -1.548313 | 0.682890  | 0.000348  |
| C5                | -1.366709 | -0.816826 | 0.101770  | C5           | -1.365945 | -0.856905 | 0.009478  |
| C6                | 2.119504  | -0.021985 | -0.211684 | C6           | 2.157260  | -0.026315 | -0.086155 |
| H7                | 0.807630  | -0.193286 | 1.491437  | H7           | 0.661630  | -0.038792 | 1.471710  |
| H8                | -0.164143 | 1.863988  | 1.015135  | H8           | 0.075426  | 2.114435  | 0.458816  |
| H9                | 0.320321  | 1.816393  | -0.685980 | H9           | 0.154567  | 1.394665  | -1.167685 |
| H10               | -2.326636 | 1.154219  | 0.258765  | H10          | -2.008158 | 1.021894  | 0.932716  |
| H11               | -1.663950 | 0.761488  | -1.339359 | H11          | -2.176927 | 1.018420  | -0.827607 |
| H12               | -1.594750 | -0.978577 | 1.167337  | H12          | -1.687951 | -1.282002 | 0.969742  |
| H13               | -1.982670 | -1.485796 | -0.501967 | H13          | -1.900974 | -1.361852 | -0.797408 |
| H14               | 2.712352  | 0.794689  | 0.212080  | H14          | 2.701039  | 0.838426  | 0.306563  |
| H15               | 2.636085  | -0.966095 | -0.019885 | H15          | 2.648299  | -0.937281 | 0.265518  |
| H16               | 2.040579  | 0.123671  | -1.293032 | H16          | 2.198427  | -0.004959 | -1.179067 |
| Conformer V       |           |           |           | TS1          |           |           |           |
| C1                | -1.760357 | -0.053724 | 0.634865  | C1           | 0.786761  | 0.117854  | -0.534080 |
| C2                | -0.800284 | 0.022101  | -0.547805 | C2           | -0.202241 | 1.267658  | -0.252399 |
| C3                | 0.158600  | 1.211340  | -0.472620 | C3           | -1.451252 | 0.557324  | 0.325661  |
| C4                | 1.244681  | 0.687458  | 0.482494  | C4           | -1.054461 | -0.928716 | 0.325380  |
| C5                | 1.185657  | -0.843487 | 0.273926  | H5           | 1.284494  | 0.234171  | -1.501010 |
| O6                | 0.071932  | -1.110436 | -0.589846 | H6           | 0.225044  | 1.994640  | 0.443924  |
| H7                | -1.218682 | -0.023612 | 1.585887  | H7           | -0.451171 | 1.792629  | -1.177788 |

|                   |           |           |           |               |           |           |           |
|-------------------|-----------|-----------|-----------|---------------|-----------|-----------|-----------|
| H8                | -2.330204 | -0.985731 | 0.594157  | H8            | -1.704690 | 0.907994  | 1.329378  |
| H9                | -2.460098 | 0.788416  | 0.611810  | H9            | -2.317454 | 0.720900  | -0.319555 |
| H10               | -1.364226 | 0.002879  | -1.485282 | H10           | -0.683990 | -1.237777 | 1.312226  |
| H11               | -0.323007 | 2.126216  | -0.116691 | H11           | -1.866197 | -1.597476 | 0.032886  |
| H12               | 0.578634  | 1.396123  | -1.465578 | O12           | -0.028206 | -1.052806 | -0.654513 |
| H13               | 1.009281  | 0.948846  | 1.517572  | C13           | 1.830688  | -0.041195 | 0.566927  |
| H14               | 2.230571  | 1.096343  | 0.249858  | H14           | 2.422610  | -0.945078 | 0.399779  |
| H15               | 1.055984  | -1.372721 | 1.225545  | H15           | 2.501649  | 0.824125  | 0.574983  |
| H16               | 2.076514  | -1.235403 | -0.223661 | H16           | 1.358381  | -0.109227 | 1.552351  |
| TS2               |           |           |           |               |           |           |           |
| O1                | 0.085059  | -1.149918 | -0.487349 |               |           |           |           |
| C2                | -1.797975 | -0.051613 | 0.607597  |               |           |           |           |
| C3                | 1.269735  | -0.788939 | 0.241081  |               |           |           |           |
| C4                | 1.204646  | 0.728455  | 0.494843  |               |           |           |           |
| C5                | 0.136303  | 1.187271  | -0.506639 |               |           |           |           |
| C6                | -0.797671 | -0.023200 | -0.542979 |               |           |           |           |
| H7                | -1.288786 | 0.030184  | 1.573133  |               |           |           |           |
| H8                | -2.353792 | -0.992768 | 0.593481  |               |           |           |           |
| H9                | -2.507797 | 0.777865  | 0.517732  |               |           |           |           |
| H10               | 1.314019  | -1.360682 | 1.174442  |               |           |           |           |
| H11               | 2.131129  | -1.062080 | -0.377009 |               |           |           |           |
| H12               | 0.887223  | 0.940671  | 1.519370  |               |           |           |           |
| H13               | 2.170082  | 1.213962  | 0.333518  |               |           |           |           |
| H14               | -0.372042 | 2.107744  | -0.206942 |               |           |           |           |
| H15               | 0.579929  | 1.333926  | -1.496420 |               |           |           |           |
| H16               | -1.330667 | -0.101319 | -1.495930 |               |           |           |           |
| MP2(Full)/cc-pVTZ |           |           |           |               |           |           |           |
| Conformer I       |           |           |           | Conformer III |           |           |           |
| C1                | 0.729730  | 0.067500  | -0.402703 | C1            | -1.948036 | -0.034008 | 0.433996  |
| C2                | -0.124645 | 1.182741  | 0.164040  | C2            | -0.767751 | -0.067342 | -0.503900 |
| C3                | -1.522028 | 0.653020  | -0.105234 | C3            | 0.118510  | 1.176596  | -0.408261 |
| C4                | -1.342378 | -0.824453 | 0.201375  | C4            | 1.253672  | 0.710521  | 0.491586  |
| H5                | 0.786787  | 0.175101  | -1.488181 | C5            | 1.395158  | -0.722438 | 0.030903  |
| H6                | 0.052249  | 1.261557  | 1.234727  | O6            | 0.062254  | -1.178585 | -0.137341 |
| H7                | 0.076471  | 2.143532  | -0.296190 | H7            | -1.613706 | 0.193907  | 1.441979  |
| H8                | -2.293085 | 1.115061  | 0.500014  | H8            | -2.441538 | -0.999740 | 0.448293  |
| H9                | -1.774521 | 0.793612  | -1.152219 | H9            | -2.664929 | 0.720664  | 0.123135  |
| H10               | -1.527339 | -1.026622 | 1.255182  | H10           | -1.112505 | -0.220367 | -1.524588 |
| H11               | -1.991854 | -1.462171 | -0.390013 | H11           | -0.423297 | 2.030447  | -0.017073 |
| O12               | 0.018219  | -1.134364 | -0.096950 | H12           | 0.512538  | 1.441166  | -1.384901 |
| C13               | 2.116356  | -0.035236 | 0.170032  | H13           | 0.951558  | 0.729701  | 1.534331  |
| H14               | 2.633265  | -0.897394 | -0.237092 | H14           | 2.160408  | 1.293525  | 0.378681  |
| H15               | 2.691582  | 0.856063  | -0.064058 | H15           | 1.882642  | -1.373395 | 0.746961  |
| H16               | 2.058490  | -0.145261 | 1.248373  | H16           | 1.941485  | -0.767207 | -0.914033 |
| Conformer IV      |           |           |           | TS1           |           |           |           |
| O1                | 0.024711  | -1.099450 | -0.198631 | C1            | 0.783700  | 0.120070  | -0.533409 |
| C2                | 0.710634  | 0.006522  | 0.369360  | C2            | -0.200733 | 1.258687  | -0.261515 |
| C3                | -0.101532 | 1.198614  | -0.100319 | C3            | -1.430122 | 0.553271  | 0.335805  |
| C4                | -1.538314 | 0.677389  | -0.021999 | C4            | -1.040797 | -0.923550 | 0.321272  |
| C5                | -1.354045 | -0.849604 | 0.027098  | H5            | 1.292573  | 0.236886  | -1.484352 |

|                  |           |           |           |               |           |           |           |
|------------------|-----------|-----------|-----------|---------------|-----------|-----------|-----------|
| C6               | 2.140149  | -0.025316 | -0.088363 | H6            | 0.223088  | 1.995872  | 0.411762  |
| H7               | 0.659312  | -0.059697 | 1.461416  | H7            | -0.463754 | 1.760974  | -1.184777 |
| H8               | 0.064751  | 2.088564  | 0.496271  | H8            | -1.663850 | 0.897548  | 1.336483  |
| H9               | 0.174024  | 1.412715  | -1.128691 | H9            | -2.300776 | 0.720736  | -0.286292 |
| H10              | -2.037291 | 1.030637  | 0.873160  | H10           | -0.668746 | -1.236901 | 1.297103  |
| H11              | -2.127184 | 0.988340  | -0.875974 | H11           | -1.852202 | -1.582712 | 0.039118  |
| H12              | -1.644909 | -1.236039 | 1.004510  | O12           | -0.028217 | -1.043509 | -0.663207 |
| H13              | -1.913837 | -1.377682 | -0.734604 | C13           | 1.802291  | -0.042412 | 0.574181  |
| H14              | 2.683595  | 0.827202  | 0.307302  | H14           | 2.388598  | -0.941542 | 0.417252  |
| H15              | 2.629840  | -0.934074 | 0.243813  | H15           | 2.470939  | 0.813172  | 0.599426  |
| H16              | 2.172658  | 0.010003  | -1.172814 | H16           | 1.313830  | -0.112355 | 1.541930  |
| TS3              |           |           |           |               |           |           |           |
| O1               | -0.005650 | -1.153816 | -0.085240 |               |           |           |           |
| C2               | 0.762871  | -0.045955 | 0.383718  |               |           |           |           |
| C3               | -0.133552 | 1.196543  | 0.224551  |               |           |           |           |
| C4               | -1.433215 | 0.636575  | -0.352535 |               |           |           |           |
| C5               | -1.364092 | -0.806070 | 0.101964  |               |           |           |           |
| C6               | 2.039457  | 0.004547  | -0.410101 |               |           |           |           |
| H7               | 0.988289  | -0.203147 | 1.439373  |               |           |           |           |
| H8               | -0.311067 | 1.664437  | 1.186826  |               |           |           |           |
| H9               | 0.322340  | 1.933968  | -0.426869 |               |           |           |           |
| H10              | -2.317415 | 1.159505  | -0.006446 |               |           |           |           |
| H11              | -1.413110 | 0.664905  | -1.436754 |               |           |           |           |
| H12              | -1.643926 | -0.891672 | 1.155751  |               |           |           |           |
| H13              | -1.969455 | -1.489736 | -0.480375 |               |           |           |           |
| H14              | 2.683666  | 0.798608  | -0.044532 |               |           |           |           |
| H15              | 2.571490  | -0.937807 | -0.335578 |               |           |           |           |
| H16              | 1.810670  | 0.191800  | -1.454858 |               |           |           |           |
| CCSD(T)/def2-SVP |           |           |           |               |           |           |           |
| Conformer I      |           |           |           | Conformer III |           |           |           |
| O1               | 0.018324  | -1.129035 | 0.184281  | C1            | -1.973739 | 0.087958  | 0.555421  |
| C2               | 0.729191  | 0.080114  | 0.459201  | C2            | -0.790839 | -0.061738 | -0.391696 |
| C3               | -0.128161 | 1.184116  | -0.164416 | C3            | 0.187092  | 1.135773  | -0.363044 |
| C4               | -1.539276 | 0.661487  | 0.116762  | C4            | 1.312508  | 0.631807  | 0.548557  |
| C5               | -1.354314 | -0.850445 | -0.084243 | C5            | 1.337537  | -0.847212 | 0.168131  |
| C6               | 2.142017  | -0.047104 | -0.081978 | O6            | -0.026786 | -1.205763 | 0.015798  |
| H7               | 0.771886  | 0.239707  | 1.560058  | H7            | -1.618841 | 0.331251  | 1.571344  |
| H8               | 0.074709  | 2.179583  | 0.263741  | H8            | -2.538260 | -0.856827 | 0.604721  |
| H9               | 0.059901  | 1.226053  | -1.253215 | H9            | -2.651480 | 0.889084  | 0.214328  |
| H10              | -1.818891 | 0.879966  | 1.162342  | H10           | -1.164788 | -0.231416 | -1.420982 |
| H11              | -2.314270 | 1.088316  | -0.540324 | H11           | -0.293978 | 2.060753  | -0.004771 |
| H12              | -1.997158 | -1.449294 | 0.586294  | H12           | 0.584610  | 1.330267  | -1.374402 |
| H13              | -1.586427 | -1.144562 | -1.126528 | H13           | 1.034368  | 0.740371  | 1.611338  |
| H14              | 2.722395  | 0.866659  | 0.130904  | H14           | 2.274689  | 1.144338  | 0.386181  |
| H15              | 2.653941  | -0.905330 | 0.381761  | H15           | 1.785182  | -1.501355 | 0.934369  |
| H16              | 2.111578  | -0.208345 | -1.172364 | H16           | 1.897721  | -0.992684 | -0.780662 |

**Table S7** The relative energies of stable conformers and the barrier heights for transition states of 2-MTHF determined by different computational methods

| Conformer                              | Lowest frequency<br>cm <sup>-1</sup> | $E_e^a$<br>Hartree | $\Delta E_e^b$<br>kJ·mol <sup>-1</sup> | ZPE <sup>c</sup><br>Hartree | $H_{298}^\circ - H_0^\circ$<br>Hartree | $\Delta E_{tot}^d$<br>kJ·mol <sup>-1</sup> |
|----------------------------------------|--------------------------------------|--------------------|----------------------------------------|-----------------------------|----------------------------------------|--------------------------------------------|
| <b>B3LYP-D3(BJ)/def2-TZVPP</b>         |                                      |                    |                                        |                             |                                        |                                            |
| I                                      | 46                                   | -271.9019516       | 0.00                                   | 0.1415373                   | 0.0073159                              | 0.00 <sup>e</sup>                          |
| II                                     | 41                                   | -271.9019913       | -0.10                                  | 0.1417221                   | 0.0073110                              | 0.37 <sup>e</sup>                          |
| TS1 (I---II)                           | -73                                  | -271.8998993       | 5.39                                   | 0.1418330                   | 0.0064022                              | 3.77 <sup>e</sup>                          |
| TS (int rot CH <sub>3</sub> , conf I)  | -227                                 | -271.8972401       | 12.37                                  | 0.1413563                   | 0.0067395                              | 10.38                                      |
| <b>MP2(full)/cc-pVTZ</b>               |                                      |                    |                                        |                             |                                        |                                            |
| I                                      | 49                                   | -271.3024802       | 0.00                                   | 0.1411119                   | 0.0072993                              | 0.00 <sup>f</sup>                          |
| IV                                     | 48                                   | -271.3023861       | 0.25                                   | 0.1411623                   | 0.0073505                              | 0.51                                       |
| III                                    | 54                                   | -271.3022429       | 0.62                                   | 0.1412998                   | 0.0071774                              | 0.80 <sup>f</sup>                          |
| TS1 (I---III)                          | -100                                 | -271.3001363       | 6.15                                   | 0.1412605                   | 0.0063864                              | 4.15 <sup>f</sup>                          |
| TS3 (I---IV)                           | -31                                  | -271.3021142       | 0.96                                   | 0.1412447                   | 0.0063419                              | -1.20                                      |
| TS (int rot CH <sub>3</sub> , conf I)  | -241                                 | -271.2971842       | 13.90                                  | 0.1408174                   | 0.0067438                              | 11.67                                      |
| <b>MP2/6-311++G(d,p)</b>               |                                      |                    |                                        |                             |                                        |                                            |
| IV                                     | 60                                   | -271.0350446       | 0.00 <sup>g</sup>                      | 0.1410077                   | 0.0073348                              | 0.00                                       |
| V                                      | 74                                   | -271.0333831       | 4.36 <sup>g</sup>                      | 0.1411520                   | 0.0072533                              | 4.53                                       |
| II                                     | 5                                    | -271.0346869       | 0.94                                   | 0.1409436                   | 0.0073345                              | 0.77                                       |
| TS1 (IV---II)                          | -96                                  | -271.0324232       | 6.88 <sup>g</sup>                      | 0.1410926                   | 0.0063833                              | 4.61                                       |
| TS2 (IV---V)                           | -63                                  | -271.0333428       | 4.47                                   | 0.1409463                   | 0.0064494                              | 1.98                                       |
| TS (int rot CH <sub>3</sub> , conf IV) | -239                                 | -271.0298407       | 13.66                                  | 0.1406448                   | 0.0067266                              | 11.11                                      |

<sup>a</sup> Electronic energy determined from quantum chemical calculation.

<sup>b</sup> Relative energies calculated without any corrections.

<sup>c</sup> ZPE and ( $H_{298}^\circ - H_0^\circ$ ) corrections scaled by the factors of 0.981, 0.961, and 0.962 for B3LYP-D3(BJ)/def2-TZVPP, MP2(Full)/cc-pVTZ, and MP2/6-311++G(d,p) methods, respectively.

<sup>d</sup> Relative energies calculated including ZPE and thermal corrections.

<sup>e</sup> These values of conformer energies and barrier height give the coefficients  $V_1 = 0.37$  kJ·mol<sup>-1</sup> and  $V_2 = 3.58$  kJ·mol<sup>-1</sup> for pseudorotational potential.

<sup>f</sup> These values of conformer energies and barrier height give the coefficients  $V_1 = 0.80$  kJ·mol<sup>-1</sup> and  $V_2 = 3.75$  kJ·mol<sup>-1</sup> for pseudorotational potential.

<sup>g</sup> These values of conformer energies and barrier height give the coefficients  $V_1 = 4.36$  kJ·mol<sup>-1</sup> and  $V_2 = 4.46$  kJ·mol<sup>-1</sup> for pseudorotational potential.



**Table S8** Ideal gas thermodynamic properties of 2-MTHF<sup>a</sup>

| T<br>K                    | $C_{p,m}^{\circ}(T)$<br>J·K <sup>-1</sup> ·mol <sup>-1</sup> | $S_m^{\circ}(T)$<br>J·K <sup>-1</sup> ·mol <sup>-1</sup> | $-[G_m^{\circ}(T) - H_m^{\circ}(0)]/T$<br>J·K <sup>-1</sup> ·mol <sup>-1</sup> | $H_m^{\circ}(T) - H_m^{\circ}(0)$<br>kJ·mol <sup>-1</sup> | $\Delta_f H_m^{\circ}$<br>kJ·mol <sup>-1</sup> | $\Delta_f S_m^{\circ}$<br>J·K <sup>-1</sup> ·mol <sup>-1</sup> | $\Delta_f G_m^{\circ}$<br>kJ·mol <sup>-1</sup> |
|---------------------------|--------------------------------------------------------------|----------------------------------------------------------|--------------------------------------------------------------------------------|-----------------------------------------------------------|------------------------------------------------|----------------------------------------------------------------|------------------------------------------------|
| 0                         | 0                                                            | 0                                                        | $\infty$                                                                       | 0                                                         | -189.88                                        | 0.00                                                           | -189.88                                        |
| 100                       | 54.79                                                        | 260.29                                                   | 215.71                                                                         | 4.46                                                      | -202.18                                        | -334.70                                                        | -168.71                                        |
| 150                       | 63.71                                                        | 284.19                                                   | 234.72                                                                         | 7.42                                                      | -207.28                                        | -376.22                                                        | -150.85                                        |
| 200                       | 74.34                                                        | 303.90                                                   | 249.61                                                                         | 10.86                                                     | -212.34                                        | -405.28                                                        | -131.28                                        |
| 250                       | 88.18                                                        | 321.92                                                   | 262.28                                                                         | 14.91                                                     | -217.47                                        | -428.21                                                        | -110.42                                        |
| <b>298.15<sup>b</sup></b> | <b>103.88</b>                                                | <b>338.77</b>                                            | <b>273.28</b>                                                                  | <b>19.53</b>                                              | <b>-222.30</b>                                 | <b>-445.88</b>                                                 | <b>-89.36</b>                                  |
| 300                       | 104.51                                                       | 339.41                                                   | 273.68                                                                         | 19.72                                                     | -222.48                                        | -446.48                                                        | -88.54                                         |
| 350                       | 121.94                                                       | 356.83                                                   | 284.32                                                                         | 25.38                                                     | -227.16                                        | -460.92                                                        | -65.84                                         |
| 400                       | 139.24                                                       | 374.25                                                   | 294.47                                                                         | 31.91                                                     | -231.42                                        | -472.32                                                        | -42.50                                         |
| 450                       | 155.70                                                       | 391.61                                                   | 304.30                                                                         | 39.29                                                     | -235.25                                        | -481.34                                                        | -18.64                                         |
| 500                       | 170.99                                                       | 408.81                                                   | 313.89                                                                         | 47.46                                                     | -238.65                                        | -488.52                                                        | 5.61                                           |
| 600                       | 197.89                                                       | 442.44                                                   | 332.53                                                                         | 65.94                                                     | -244.28                                        | -498.80                                                        | 55.01                                          |
| 700                       | 220.44                                                       | 474.69                                                   | 350.55                                                                         | 86.89                                                     | -248.51                                        | -505.35                                                        | 105.24                                         |
| 800                       | 239.49                                                       | 505.40                                                   | 368.01                                                                         | 109.92                                                    | -251.52                                        | -509.40                                                        | 155.99                                         |
| 900                       | 255.69                                                       | 534.57                                                   | 384.91                                                                         | 134.70                                                    | -253.49                                        | -511.72                                                        | 207.06                                         |
| 1000                      | 269.53                                                       | 562.24                                                   | 401.27                                                                         | 160.97                                                    | -254.58                                        | -512.88                                                        | 258.30                                         |
| 1100                      | 281.40                                                       | 588.50                                                   | 417.11                                                                         | 188.54                                                    | -254.94                                        | -513.23                                                        | 309.61                                         |
| 1200                      | 291.61                                                       | 613.44                                                   | 432.44                                                                         | 217.20                                                    | -254.70                                        | -513.02                                                        | 360.93                                         |
| 1300                      | 300.40                                                       | 637.13                                                   | 447.28                                                                         | 246.81                                                    | -253.97                                        | -512.45                                                        | 412.21                                         |
| 1400                      | 307.99                                                       | 659.68                                                   | 461.65                                                                         | 277.24                                                    | -252.87                                        | -511.63                                                        | 463.41                                         |
| 1500                      | 314.57                                                       | 681.16                                                   | 475.58                                                                         | 308.37                                                    | -251.46                                        | -510.66                                                        | 514.53                                         |

<sup>a</sup> These thermodynamic properties were calculated using molecular parameters from Table 6 and experimental value of  $\Delta_f H_m^{\circ}(2\text{-MTHF, g, } 298.15 \text{ K}) = 222.3 \pm 2.0$  kJ·mol<sup>-1</sup> from ref. 16.

<sup>b</sup> The contributions to the thermodynamic functions of the different motions at 298.15 K are summarized in Table S9.

**Table S9** Contributions to the thermodynamic functions of the different types of motion at 298.15 K for 2-MTHF

| Motion                              | $C_{p,m}^{\circ}(T)$<br>$\text{J}\cdot\text{K}^{-1}\cdot\text{mol}^{-1}$ | $S_m^{\circ}(T)$<br>$\text{J}\cdot\text{K}^{-1}\cdot\text{mol}^{-1}$ | $-[G_m^{\circ}(T) - H_m^{\circ}(0)]/T$<br>$\text{J}\cdot\text{K}^{-1}\cdot\text{mol}^{-1}$ | $H_m^{\circ}(T) - H_m^{\circ}(0)$<br>$\text{kJ}\cdot\text{mol}^{-1}$ |
|-------------------------------------|--------------------------------------------------------------------------|----------------------------------------------------------------------|--------------------------------------------------------------------------------------------|----------------------------------------------------------------------|
| Translational                       | 20.786                                                                   | 164.427                                                              | 143.641                                                                                    | 6.197                                                                |
| Rotational                          | 12.472                                                                   | 109.943                                                              | 97.471                                                                                     | 3.718                                                                |
| Vibrational                         | 55.682                                                                   | 28.095                                                               | 9.192                                                                                      | 5.636                                                                |
| CH <sub>3</sub> internal rotational | 8.990                                                                    | 10.174                                                               | 4.470                                                                                      | 1.701                                                                |
| Pseudorotational                    | 5.952                                                                    | 26.130                                                               | 18.504                                                                                     | 2.274                                                                |
| Total                               | 103.882                                                                  | 338.769                                                              | 273.278                                                                                    | 19.526                                                               |
